# Supplementary material
Source: PubMed Central journal article supplement (PMC7206933)
Supplement: NEJMoa2006923_appendix.pdf [file NEJMoa2006923_appendix.pdf]

## Supplementary Appendix

This appendix has been provided by the authors to give readers additional information about their work.

Supplement to: Mancia G, Rea F, Ludernani M, Apolone G, Corrao G. Renin–angiotensin–aldosterone system blockers and the risk of Covid-19. *N Engl J Med*. DOI: [10.1056/NEJMoa2006923](https://doi.org/10.1056/NEJMoa2006923)

# Supplementary Appendix

## Blockers of the renin-angiotensin system and the risk of Covid-19 infection

Giuseppe Mancina MD<sup>1,2</sup>, Federico Rea PhD<sup>3,4</sup>, Monica Ludergnani MSc<sup>5</sup>, Giovanni Apolone MD<sup>6</sup>, Giovanni Corrao PhD<sup>3,4</sup>

<sup>1</sup> Emeritus Professor, University of Milano-Bicocca, Milan, Italy

<sup>2</sup> Policlinico di Monza, Monza, Italy

<sup>3</sup> National Centre of Healthcare Research and Pharmacoepidemiology, University of Milano-Bicocca, Milan, Italy

<sup>4</sup> Unit of Biostatistics, Epidemiology and Public Health, Department of Statistics and Quantitative Methods, University of Milano-Bicocca, Milan, Italy

<sup>5</sup> ARIA S.p.a., Milan, Italy

<sup>6</sup> Scientific Director, Fondazione IRCCS Istituto Nazionale dei Tumori, Milan, Italy

## Table of Contents

|                                                                                                                                                                                                                                                                                                                                      |    |
|--------------------------------------------------------------------------------------------------------------------------------------------------------------------------------------------------------------------------------------------------------------------------------------------------------------------------------------|----|
| <b>Calculating individual Chronic Related Score</b> .....                                                                                                                                                                                                                                                                            | 3  |
| <b>Figure S1.</b> Adjusted odds ratios (OR), and 95% confidence intervals (CI), of infection from Covid-19 associated with use of antihypertensive agents during different time windows in the year 2019. Data refer to patients with residence in Lombardy (Italy) included in the study from February 21 until March 11 2020 ..... | 4  |
| <b>Table S1.</b> Diagnostic and therapeutic codes used in the current study for drawing records and fields from Healthcare Utilization databases .....                                                                                                                                                                               | 5  |
| <b>Table S2.</b> ARBs, ACEIs, other antihypertensive drugs, drugs for a variety of other diseases, and other features of men and women with diagnosis of infection from Covid-19 (cases) and corresponding matched controls .....                                                                                                    | 7  |
| <b>Table S3.</b> Adjusted odds ratios, and 95% confidence intervals, of Covid-19 infection associated with use of non-antihypertensive drugs and other features, according with the severity of clinical manifestations (mild-moderate and critical/fatal), sex and age at diagnosis (< 60 and ≥ 60 years) ..                        | 10 |
| <b>Table S4.</b> ARBs, ACEIs, other antihypertensive drugs, drugs for a variety of other diseases, and other features of younger (age < 60 years) and older (age ≥ 60 years) patients with diagnosis of infection from Covid-19 (cases) and corresponding matched controls.....                                                      | 12 |
| <b>Table S5.</b> ARBs, ACEIs, other antihypertensives drugs, drugs for a variety of other diseases, and other features of patients with diagnosis of infection from Covid-19 (cases) and corresponding matched controls according with the severity of clinical manifestations (mild-moderate and critical/fatal) .....              | 14 |
| <b>Table S6.</b> Adjusted odds ratios, and 95% confidence intervals, of infection from Covid-19 associated with use of blockers of the renin-angiotensin system, according with the period on which Covid-19 cases were diagnosed (before and after 26th February, 2020).....                                                        | 17 |

## **Calculating individual Chronic Related Score**

The list of predictors used for calculating CReSc, and the corresponding weights, is reported in the original paper [1]. Briefly, the presence of 31 diseases / conditions was traced from footprints left by NHS beneficiaries through diagnostic and procedure codes in private and public hospital records, drugs dispensed in community pharmacies or in hospital setting, outpatient visits and diagnostic tests performed laboratories accredited from the NHS, and co-payment exemptions for diagnosed chronic diseases. A string with 31 values was built for each beneficiary, so that each disease / condition was indexed as 1 whether a footprint suggestive of its presence was left at least once within two years prior to the index year, 0 otherwise. A weight was assigned to each disease according to how much it predicted the outcome (i.e., 5-year mortality). Finally, CReSc was calculated by categorising the individual sum of the string values into 1 of the 5 categories denoting a progressive worsening comorbidity status. The CReSc performances, which were tested through NHS beneficiaries from Lombardy Region, showed (i) an area under the receiver operating characteristic curve of 0.730, (ii) a net reclassification ability improved of 44% to 52% with respect to other scores (such as the Charlson Comorbidity Index), and (iii) a remarkable calibration of observed and predicted 5-year probability.

[1] Rea F, Corrao G, Ludergnani M, Cajazzo L, Merlino L. A new population-based risk stratification tool was developed and validated for predicting mortality, hospital admissions, and health care costs. *J Clin Epidemiol* 2019;116:62-71

**Figure S1.** Adjusted odds ratios (OR), and 95% confidence intervals (CI), of infection from Covid-19 associated with use of antihypertensive agents during different time windows in the year 2019. Data refer to patients with residence in Lombardy (Italy) included in the study from February 21 until March 11 2020

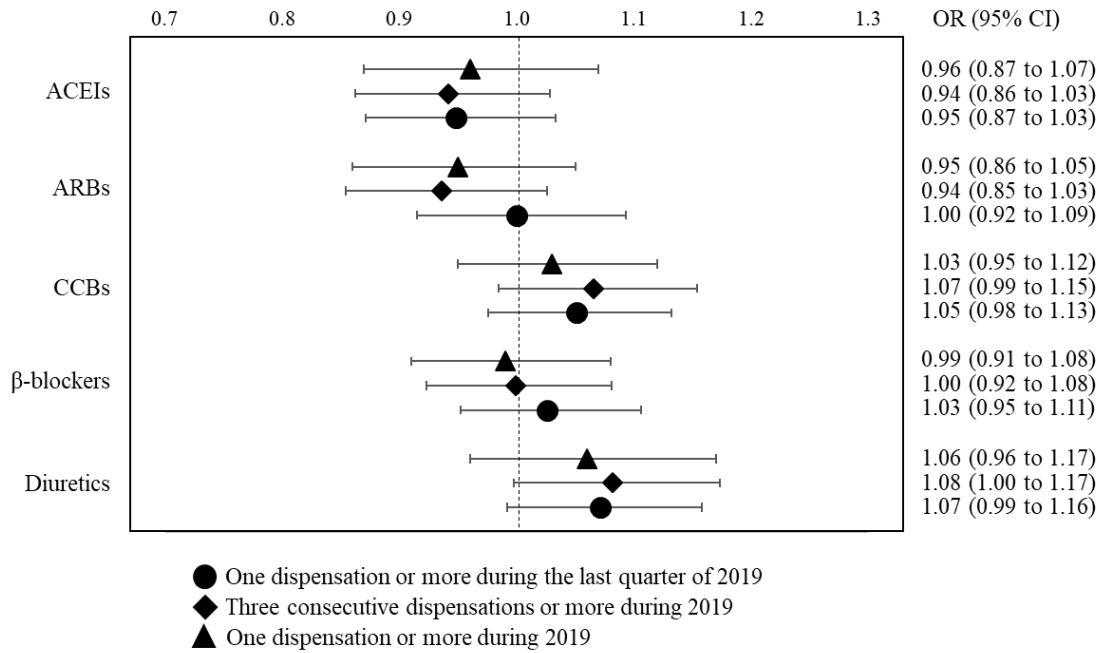

**Footnote.** ACEI: Angiotensin converting enzyme inhibitors; ARB: Angiotensin II receptor blockers; CCB: Calcium channel blocker. Odds ratios, and 95% confidence intervals, estimated by fitting conditional logistic regression. Estimates were fully adjusted for drug therapies and comorbidities listed in Table 1

**Table S1.** Diagnostic and therapeutic codes used in the current study for drawing records and fields from Healthcare Utilization databases

|                                       | <b>Codes</b>                                                                                                                 |
|---------------------------------------|------------------------------------------------------------------------------------------------------------------------------|
| <b>Drugs †</b>                        |                                                                                                                              |
| Antihypertensive classes              |                                                                                                                              |
| ACEIs                                 | C09A, C09BA, C09BB, C09BX01                                                                                                  |
| ARBs                                  | C09C, C09DA, C09DB                                                                                                           |
| CCBs                                  | C08C, C08D, C08E, C08G, C09BB, C09BX01, C09DB                                                                                |
| Diuretics                             | C03, C07B, C07C, C07D, C08G, C09BA, C09BX01, C09DA                                                                           |
| Thiazide/Thiazide-like                | C03A, C03B, C07B, C07C, C09BA, C09BX01, C09DA                                                                                |
| Loop                                  | C03C                                                                                                                         |
| MRA                                   | C03DA                                                                                                                        |
| β-blockers                            | C07A, C07B, C07C, C07D                                                                                                       |
| Oral antidiabetic drugs               | A10B                                                                                                                         |
| Metformin                             | A10BA02                                                                                                                      |
| Sulfonylureas                         | A10BB                                                                                                                        |
| DPP-4 inhibitors                      | A10BH                                                                                                                        |
| GLP-1 agonists                        | A10BJ                                                                                                                        |
| SGLT2 inhibitors                      | A10BK                                                                                                                        |
| Thiazolidinediones                    | A10BG                                                                                                                        |
| Other oral antidiabetic               | A10BD, A10BF, A10BX                                                                                                          |
| Insulin                               | A10A                                                                                                                         |
| Lipid-lowering drugs                  | C10                                                                                                                          |
| Antiplatelet drugs                    | B01AC                                                                                                                        |
| Oral anticoagulant agents             | B01AA, B01AE, B01AF                                                                                                          |
| Digitalis                             | C01AA                                                                                                                        |
| Nitrates                              | C01DA                                                                                                                        |
| Drugs for respiratory disease         |                                                                                                                              |
| LABA                                  | R03AC12, R03AC13, R03AC18, R03AC19, R03AK06, R03AK07, R03AK08, R03AK10, R03AK11, R03AL03, R03AL04, R03AL05, R03AL06, R03AL09 |
| SABA                                  | R03AC02, R03AC03, R03AC04, R03CC02, R03CC04, R03AL01, R03AL02                                                                |
| Inhaled corticosteroids               | R03BA01, R03BA05, R03BA03, R03BA02, R03BA08                                                                                  |
| Other medicaments                     | R03BB01, R03BB02, R03BB04, R03BC01, R03BC03, R03DA04, R03DC01, R03DC03                                                       |
| Immunosuppressant agents              | H02AB, L01BA01, L01XC, L04AA10, L04AD, L04AX03                                                                               |
| Non-steroidal anti-inflammatory drugs | M01A                                                                                                                         |
| Non-selective COX inhibitors          | M01AA, M01AB, M01AC, M01AE, M01AG, M01AX                                                                                     |

Selective COX2 inhibitors M01AH

---

**Comorbidities and associated procedures †**

|                                       |                                                                      |
|---------------------------------------|----------------------------------------------------------------------|
| Cardiovascular disease                | 390.x – 459.x                                                        |
| Coronary artery disease               | 410.x-414.x                                                          |
| Percutaneous coronary intervention    | 00.66, 36.01, 36.02, 36.03, 36.05, 36.06, 36.07<br>(procedure codes) |
| Heart failure                         | 402.01, 402.11, 402.91, 428.x                                        |
| Respiratory diseases                  | 460 – 519.x                                                          |
| Chronic obstructive pulmonary disease | 490-492.x, 494.x, 496                                                |
| Asthma                                | 493.x                                                                |
| Kidney disease                        | 584.x – 586                                                          |
| Chronic kidney disease                | 585.x                                                                |
| Dialysis §                            | K03A                                                                 |
| Cancer                                | 140.x – 239.x                                                        |

---

ACEI: Angiotensin converting enzyme inhibitors; ARB: Angiotensin II receptor blockers; CCB: Calcium channel blocker; MRA: Mineralocorticoid receptor antagonists; DPP-4: Dipeptidyl peptidase 4; GLP-1: Glucagon-like peptide-1; SGLT2: Sodium-glucose co-transporter 2; LABA: Long-acting  $\beta$ -agonists; SABA Short-acting  $\beta$ -agonists

† According to the ATC (Anatomical-Therapeutic-Chemical) classification system

‡ According to the ICD-9-CM (International Classification of Disease, 9th Revision) system

§ According to the regional outpatients services coding

**Table S2.** ARBs, ACEIs, other antihypertensive drugs, drugs for a variety of other diseases, and other features of men and women with diagnosis of infection from Covid-19 (cases) and corresponding matched controls

|                           | Cases<br>(N=2,303) | Women<br>Controls<br>(N=11,357) | Relative<br>difference | Cases<br>(N=3,969) | Men<br>Controls<br>(N=19,402) | Relative<br>difference |
|---------------------------|--------------------|---------------------------------|------------------------|--------------------|-------------------------------|------------------------|
| <b>Age, years</b>         |                    |                                 |                        |                    |                               |                        |
| Mean (SD)                 | 66 (14)            | 66 (14)                         | MV                     | 68 (12)            | 68 (12)                       | MV                     |
| <b>Drugs†</b>             |                    |                                 |                        |                    |                               |                        |
| Antihypertensive drugs    | 1,247 (54.2%)      | 5,173 (45.6%)                   | +15.9%                 | 2,385 (60.1%)      | 10,146 (52.3%)                | +13.0%                 |
| ACEIs                     | 451 (19.6%)        | 1,956 (17.2%)                   | +12.1%                 | 1,051 (26.5%)      | 4,613 (23.8%)                 | +10.2%                 |
| ARBs                      | 486 (21.1%)        | 2,076 (18.3%)                   | +13.4%                 | 908 (22.9%)        | 3,834 (19.8%)                 | +13.6%                 |
| CCBs                      | 467 (20.3%)        | 1,814 (16.0%)                   | +21.2%                 | 979 (24.7%)        | 4,112 (21.2%)                 | +14.1%                 |
| Diuretics                 | 716 (31.1%)        | 2,710 (23.9%)                   | +23.3%                 | 1,186 (29.9%)      | 4,710 (24.3%)                 | +18.8%                 |
| Thiazide/Thiazide-like    | 429 (18.6%)        | 1,918 (16.9%)                   | +9.3%                  | 675 (17.0%)        | 3,156 (16.3%)                 | +4.4%                  |
| Loop                      | 317 (13.8%)        | 821 (7.2%)                      | +47.5%                 | 554 (14.0%)        | 1,590 (8.2%)                  | +41.3%                 |
| MRA                       | 82 (3.6%)          | 211 (1.9%)                      | +47.8%                 | 157 (4.0%)         | 527 (2.7%)                    | +31.3%                 |
| β-blockers                | 657 (28.5%)        | 2,458 (21.6%)                   | +24.1%                 | 1,169 (29.5%)      | 4,665 (24.0%)                 | +18.4%                 |
| Monotherapy               | 368 (16.0%)        | 1,677 (14.8%)                   | +7.6%                  | 699 (17.6%)        | 3,226 (16.6%)                 | +5.6%                  |
| Combination therapy       | 879 (38.2%)        | 3,496 (30.8%)                   | +19.4%                 | 1,686 (42.5%)      | 6,920 (35.7%)                 | +16.0%                 |
| Oral antidiabetic drugs   | 244 (10.6%)        | 848 (7.5%)                      | +29.5%                 | 617 (15.6%)        | 2,310 (11.9%)                 | +23.4%                 |
| Metformin                 | 169 (7.3%)         | 638 (5.6%)                      | +23.5%                 | 459 (11.6%)        | 1,693 (8.7%)                  | +24.6%                 |
| Sulfonylureas             | 64 (2.8%)          | 192 (1.7%)                      | +39.2%                 | 150 (3.8%)         | 589 (3.0%)                    | +19.7%                 |
| DPP-4 inhibitors          | 29 (1.3%)          | 89 (0.8%)                       | +37.8%                 | 60 (1.5%)          | 224 (1.2%)                    | +23.6%                 |
| GLP-1 agonists            | 20 (0.9%)          | 46 (0.4%)                       | +53.4%                 | 45 (1.1%)          | 149 (0.8%)                    | +32.3%                 |
| SGLT2 inhibitors          | 12 (0.5%)          | 25 (0.2%)                       | +57.8%                 | 35 (0.9%)          | 84 (0.4%)                     | +50.9%                 |
| Thiazolidinediones        | 12 (0.5%)          | 27 (0.2%)                       | +54.4%                 | 23 (0.6%)          | 68 (0.4%)                     | +39.5%                 |
| Other oral antidiabetic   | 63 (2.7%)          | 204 (1.8%)                      | +34.3%                 | 156 (3.9%)         | 621 (3.2%)                    | +18.6%                 |
| Insulin                   | 111 (4.8%)         | 231 (2.0%)                      | +57.8%                 | 227 (5.7%)         | 632 (3.3%)                    | +43.1%                 |
| Lipid-lowering drugs      | 571 (24.8%)        | 2,305 (20.3%)                   | +18.1%                 | 1,357 (34.2%)      | 5,528 (28.5%)                 | +16.7%                 |
| Antiplatelet drugs        | 400 (17.4%)        | 1,259 (11.1%)                   | +36.2%                 | 963 (24.3%)        | 3,609 (18.6%)                 | +23.3%                 |
| Oral anticoagulant agents | 211 (9.2%)         | 583 (5.1%)                      | +44.0%                 | 432 (10.9%)        | 1,590 (8.2%)                  | +24.7%                 |
| Digitalis                 | 35 (1.5%)          | 71 (0.6%)                       | +58.9%                 | 31 (0.8%)          | 99 (0.5%)                     | +34.7%                 |



|                                                |             |               |        |               |               |        |
|------------------------------------------------|-------------|---------------|--------|---------------|---------------|--------|
| Nitrates                                       | 67 (2.9%)   | 142 (1.3%)    | +57.0% | 134 (3.4%)    | 482 (2.5%)    | +26.4% |
| Drugs for respiratory disease as a whole       | 343 (14.9%) | 1,187 (10.5%) | +29.8% | 600 (15.1%)   | 1,983 (10.2%) | +32.4% |
| LABA                                           | 171 (7.4%)  | 528 (4.7%)    | +37.4% | 337 (8.5%)    | 999 (5.2%)    | +39.4% |
| SABA                                           | 103 (4.5%)  | 342 (3.0%)    | +32.7% | 165 (4.2%)    | 538 (2.8%)    | +33.3% |
| Inhaled corticosteroids                        | 186 (8.1%)  | 655 (5.8%)    | +28.6% | 313 (7.9%)    | 1,003 (5.2%)  | +34.5% |
| Other drugs for respiratory disease            | 103 (4.5%)  | 203 (1.8%)    | +60.0% | 155 (3.9%)    | 411 (2.1%)    | +45.8% |
| Immunosuppressant agents                       | 344 (14.9%) | 1,130 (10.0%) | +33.4% | 458 (11.5%)   | 1,581 (8.2%)  | +29.4% |
| Non-steroidal anti-inflammatory drugs          | 437 (19.0%) | 1,972 (17.4%) | +8.5%  | 599 (15.1%)   | 2,607 (13.4%) | +11.0% |
| Non-selective COX inhibitors                   | 345 (15.0%) | 1,646 (14.5%) | +3.3%  | 519 (13.1%)   | 2,268 (11.7%) | +10.6% |
| Selective COX2 inhibitors                      | 123 (5.3%)  | 517 (4.6%)    | +14.8% | 129 (3.3%)    | 522 (2.7%)    | +17.2% |
| <b>Comorbidities and associated procedures</b> |             |               |        |               |               |        |
| Cardiovascular disease                         | 551 (23.9%) | 1,731 (15.2%) | +36.3% | 1,340 (33.8%) | 4,948 (25.5%) | +24.5% |
| Coronary artery disease                        | 87 (3.8%)   | 260 (2.3%)    | +39.4% | 386 (9.7%)    | 1,259 (6.5%)  | +33.3% |
| Percutaneous coronary intervention             | 41 (1.8%)   | 115 (1.0%)    | +43.1% | 203 (5.1%)    | 708 (3.7%)    | +28.7% |
| Heart failure                                  | 110 (4.8%)  | 210 (1.9%)    | +61.3% | 213 (5.4%)    | 549 (2.8%)    | +47.3% |
| Respiratory diseases                           | 196 (8.5%)  | 465 (4.1%)    | +51.9% | 455 (11.5%)   | 1,251 (6.5%)  | +43.8% |
| Chronic obstructive pulmonary disease          | 52 (2.3%)   | 98 (0.9%)     | +61.8% | 136 (3.4%)    | 335 (1.7%)    | +49.6% |
| Asthma                                         | 12 (0.5%)   | 18 (0.2%)     | +69.6% | 6 (0.2%)      | 17 (0.1%)     | +42.0% |
| Kidney disease                                 | 82 (3.6%)   | 188 (1.7%)    | +53.5% | 229 (5.8%)    | 630 (3.3%)    | +43.7% |
| Chronic kidney disease                         | 48 (2.1%)   | 86 (0.8%)     | +63.7% | 133 (3.4%)    | 307 (1.6%)    | +52.8% |
| Dialysis                                       | 13 (0.6%)   | 10 (0.1%)     | +84.4% | 36 (0.9%)     | 44 (0.2%)     | +75.0% |
| Cancer                                         | 367 (15.9%) | 1,446 (12.7%) | +20.1% | 724 (18.2%)   | 3,193 (16.5%) | +9.8%  |
| <b>Chronic Related Score<sup>†</sup></b>       |             |               |        |               |               |        |
| 0                                              | 899 (39.1%) | 5,549 (48.9%) | -25.2% | 1,217 (30.7%) | 7,502 (38.7%) | -26.1% |
| 1                                              | 581 (25.2%) | 2,964 (26.1%) | -3.5%  | 869 (21.9%)   | 4,661 (24.0%) | -9.7%  |
| 2                                              | 373 (16.2%) | 1,555 (13.7%) | +15.5% | 744 (18.7%)   | 3,301 (17.0%) | +9.2%  |
| 3                                              | 189 (8.2%)  | 630 (5.5%)    | +32.4% | 487 (12.3%)   | 1,828 (9.4%)  | +23.2% |
| 4                                              | 261 (11.3%) | 659 (5.8%)    | +48.8% | 652 (16.4%)   | 2,110 (10.9%) | +33.8% |

MV: Matching variables; SD: Standard deviation; ACEI: Angiotensin converting enzyme inhibitors; ARB: Angiotensin II receptor blockers; CCB: Calcium channel blocker; MRA: Mineralocorticoid receptor antagonists; DPP-4: Dipeptidyl peptidase 4; GLP-1: Glucagon-like peptide-1; SGLT2: Sodium-glucose co-transporter 2; LABA: Long-acting  $\beta$ -agonists; SABA Short-acting  $\beta$ -agonists

<sup>†</sup> At least one prescription during the year 2019

‡ Chronic Related Score is a new index of patients' clinical profile derived from inpatient and outpatient services provided by the Regional Health Service and validated for outcome prediction [28]. Five categories of progressively worsening clinical profile are considered

1 **Table S3.** Adjusted odds ratios, and 95% confidence intervals, of Covid-19 infection associated with use of non-antihypertensive drugs and  
 2 other features, according with the severity of clinical manifestations (mild-moderate and critical/fatal), sex and age at diagnosis (< 60 and ≥  
 3 60 years)

|                                                | Odds ratio (95% confidence interval) <sup>§</sup>   |                                                   |                                             |                                           |                                                     |                                                      |
|------------------------------------------------|-----------------------------------------------------|---------------------------------------------------|---------------------------------------------|-------------------------------------------|-----------------------------------------------------|------------------------------------------------------|
|                                                | Mild-moderate<br>(5,655 cases /<br>27,790 controls) | Critical/fatal<br>(617 cases / 2,969<br>controls) | Women<br>(2,303 cases /<br>11,357 controls) | Men<br>(3,969 cases /<br>19,402 controls) | Age < 60 years<br>(1,932 cases /<br>9,615 controls) | Age ≥ 60 years<br>(4,340 cases /<br>21,144 controls) |
| <b>Drugs<sup>†</sup></b>                       |                                                     |                                                   |                                             |                                           |                                                     |                                                      |
| Oral antidiabetic drugs                        | 1.04 (0.94 to 1.15)                                 | 1.23 (0.96 to 1.59)                               | 1.05 (0.88 to 1.26)                         | 1.08 (0.96 to 1.20)                       | 0.85 (0.63 to 1.15)                                 | 1.09 (0.99 to 1.21)                                  |
| Insulin                                        | 1.35 (1.15 to 1.58)                                 | 1.52 (1.06 to 2.17)                               | 1.58 (1.22 to 2.05)                         | 1.29 (1.09 to 1.53)                       | 1.09 (0.68 to 1.76)                                 | 1.42 (1.22 to 1.65)                                  |
| Lipid-lowering drugs                           | 1.01 (0.93 to 1.09)                                 | 1.10 (0.89 to 1.36)                               | 1.01 (0.88 to 1.14)                         | 1.04 (0.95 to 1.14)                       | 0.94 (0.76 to 1.16)                                 | 1.04 (0.96 to 1.12)                                  |
| Antiplatelet drugs                             | 1.17 (1.06 to 1.28)                                 | 1.30 (1.02 to 1.65)                               | 1.41 (1.21 to 1.64)                         | 1.11 (0.99 to 1.23)                       | 0.91 (0.65 to 1.27)                                 | 1.21 (1.10 to 1.33)                                  |
| Oral anticoagulant<br>agents                   | 1.16 (1.03 to 1.31)                                 | 1.19 (0.89 to 1.60)                               | 1.43 (1.16 to 1.76)                         | 1.06 (0.93 to 1.21)                       | 1.55 (0.96 to 2.51)                                 | 1.15 (1.03 to 1.30)                                  |
| Digitalis                                      | 1.24 (0.89 to 1.73)                                 | 1.22 (0.56 to 2.64)                               | 1.42 (0.90 to 2.25)                         | 1.04 (0.68 to 1.58)                       | 0.72 (0.06 to 8.89)                                 | 1.26 (0.93 to 1.71)                                  |
| Nitrates                                       | 1.04 (0.86 to 1.27)                                 | 0.97 (0.63 to 1.50)                               | 1.37 (0.99 to 1.89)                         | 0.92 (0.75 to 1.14)                       | 0.16 (0.02 to 1.21)                                 | 1.06 (0.89 to 1.27)                                  |
| Drugs for respiratory<br>disease               | 1.29 (1.18 to 1.41)                                 | 1.02 (0.78 to 1.34)                               | 1.19 (1.03 to 1.37)                         | 1.30 (1.17 to 1.44)                       | 1.25 (1.04 to 1.50)                                 | 1.26 (1.14 to 1.39)                                  |
| Immunosuppressant<br>agents                    | 1.26 (1.15 to 1.38)                                 | 1.68 (1.30 to 2.18)                               | 1.38 (1.20 to 1.58)                         | 1.26 (1.13 to 1.41)                       | 1.35 (1.12 to 1.62)                                 | 1.30 (1.18 to 1.43)                                  |
| NSAIDs                                         | 1.08 (0.99 to 1.17)                                 | 0.96 (0.75 to 1.24)                               | 1.04 (0.92 to 1.17)                         | 1.08 (0.98 to 1.19)                       | 0.84 (0.71 to 1.00)                                 | 1.13 (1.04 to 1.23)                                  |
| <b>Comorbidities and associated procedures</b> |                                                     |                                                   |                                             |                                           |                                                     |                                                      |
| Cardiovascular disease                         | 1.02 (0.92 to 1.13)                                 | 0.92 (0.71 to 1.19)                               | 1.00 (0.84 to 1.19)                         | 1.01 (0.90 to 1.13)                       | 1.15 (0.87 to 1.52)                                 | 1.00 (0.90 to 1.10)                                  |
| Respiratory diseases                           | 1.34 (1.19 to 1.52)                                 | 1.54 (1.14 to 2.07)                               | 1.38 (1.12 to 1.70)                         | 1.37 (1.20 to 1.56)                       | 1.69 (1.28 to 2.22)                                 | 1.33 (1.18 to 1.51)                                  |
| Kidney disease                                 | 1.04 (0.85 to 1.28)                                 | 1.51 (1.00 to 2.29)                               | 1.12 (0.78 to 1.63)                         | 1.16 (0.94 to 1.43)                       | 0.83 (0.37 to 1.87)                                 | 1.15 (0.96 to 1.39)                                  |
| Cancer                                         | 1.07 (0.96 to 1.20)                                 | 0.87 (0.65 to 1.16)                               | 1.12 (0.93 to 1.34)                         | 1.01 (0.89 to 1.15)                       | 1.15 (0.89 to 1.47)                                 | 1.02 (0.91 to 1.14)                                  |
| <b>Chronic Related Score<sup>‡</sup></b>       |                                                     |                                                   |                                             |                                           |                                                     |                                                      |
| 0                                              | 1.00 (Ref.)                                         | 1.00 (Ref.)                                       | 1.00 (Ref.)                                 | 1.00 (Ref.)                               | 1.00 (Ref.)                                         | 1.00 (Ref.)                                          |
| 1                                              | 1.18 (1.07 to 1.30)                                 | 1.56 (1.09 to 2.22)                               | 1.23 (1.06 to 1.43)                         | 1.16 (1.03 to 1.31)                       | 1.21 (1.03 to 1.42)                                 | 1.17 (1.04 to 1.32)                                  |
| 2                                              | 1.35 (1.20 to 1.52)                                 | 1.81 (1.23 to 2.67)                               | 1.35 (1.11 to 1.63)                         | 1.36 (1.18 to 1.56)                       | 1.46 (1.15 to 1.86)                                 | 1.35 (1.18 to 1.54)                                  |
| 3                                              | 1.50 (1.29 to 1.75)                                 | 2.23 (1.44 to 3.47)                               | 1.54 (1.20 to 1.98)                         | 1.52 (1.28 to 1.81)                       | 1.26 (0.82 to 1.96)                                 | 1.57 (1.34 to 1.84)                                  |
| 4                                              | 1.53 (1.29 to 1.82)                                 | 2.08 (1.29 to 3.37)                               | 1.71 (1.30 to 2.25)                         | 1.52 (1.25 to 1.85)                       | 1.44 (0.82 to 2.52)                                 | 1.57 (1.32 to 1.87)                                  |

- 1 ACEI: Angiotensin converting enzyme inhibitors; ARB: Angiotensin II receptor blockers; CCB: Calcium channel blocker; NSAIDs: Non-steroidal anti-inflammatory drugs
- 2 † At least one prescription during the year 2019
- 3 ‡ Chronic Related Score is a new index of patients' clinical profile derived from inpatient and outpatient services provided by the Regional Health Service and validated for outcome  
4 prediction [28]. Five categories of progressively worsening clinical profile are considered
- 5 § Odds ratios of Covid-infection risk associated with exposure to treatments and comorbidities. No exposure was considered as reference, unless otherwise reported. Estimates were  
6 obtained by fitting conditional logistic regression. Estimates were unadjusted and full adjusted for drugs and comorbidities listed in the Table

**Table S4.** ARBs, ACEIs, other antihypertensive drugs, drugs for a variety of other diseases, and other features of younger (age < 60 years) and older (age ≥ 60 years) patients with diagnosis of infection from Covid-19 (cases) and corresponding matched controls

|                           | Age < 60 years     |                       |                        | Age ≥ 60 years     |                        |                        |
|---------------------------|--------------------|-----------------------|------------------------|--------------------|------------------------|------------------------|
|                           | Cases<br>(N=1,932) | Controls<br>(N=9,615) | Relative<br>difference | Cases<br>(N=4,340) | Controls<br>(N=21,144) | Relative<br>difference |
| <b>Women</b>              | 875 (45%)          | 4,348 (45%)           | MV                     | 1,428 (33%)        | 7,009 (33%)            | MV                     |
| <b>Drugs†</b>             |                    |                       |                        |                    |                        |                        |
| Antihypertensive drugs    | 519 (26.9%)        | 1,871 (19.5%)         | +27.6%                 | 3,113 (71.7%)      | 13,448 (63.6%)         | +11.3%                 |
| ACEIs                     | 197 (10.2%)        | 757 (7.9%)            | +22.8%                 | 1,305 (30.1%)      | 5,812 (27.5%)          | +8.6%                  |
| ARBs                      | 201 (10.4%)        | 719 (7.5%)            | +28.1%                 | 1,193 (27.5%)      | 5,191 (24.6%)          | +10.7%                 |
| CCBs                      | 189 (9.8%)         | 595 (6.2%)            | +36.7%                 | 1,257 (29.0%)      | 5,331 (25.2%)          | +13.0%                 |
| Diuretics                 | 171 (8.9%)         | 572 (6.0%)            | +32.8%                 | 1,731 (39.9%)      | 6,848 (32.4%)          | +18.8%                 |
| Thiazide/Thiazide-like    | 135 (7.0%)         | 473 (4.9%)            | +29.6%                 | 969 (22.3%)        | 4,601 (21.8%)          | +2.5%                  |
| Loop                      | 31 (1.6%)          | 86 (0.9%)             | +44.3%                 | 840 (19.4%)        | 2,325 (11.0%)          | +43.2%                 |
| MRA                       | 11 (0.6%)          | 30 (0.3%)             | +45.2%                 | 228 (5.3%)         | 708 (3.4%)             | +36.3%                 |
| β-blockers                | 206 (10.7%)        | 693 (7.2%)            | +32.4%                 | 1,620 (37.3%)      | 6,430 (30.4%)          | +18.5%                 |
| Monotherapy               | 218 (11.3%)        | 871 (9.1%)            | +19.7%                 | 849 (19.6%)        | 4,032 (19.1%)          | +2.5%                  |
| Combination therapy       | 301 (15.6%)        | 1,000 (10.4%)         | +33.2%                 | 2,264 (52.2%)      | 9,416 (44.5%)          | +14.6%                 |
| Oral antidiabetic drugs   | 72 (3.7%)          | 315 (3.3%)            | +12.1%                 | 789 (18.2%)        | 2,843 (13.5%)          | +26.0%                 |
| Metformin                 | 58 (3.0%)          | 283 (2.9%)            | +2.0%                  | 570 (13.1%)        | 2,048 (9.7%)           | +26.3%                 |
| Sulfonylureas             | 11 (0.6%)          | 53 (0.6%)             | +3.2%                  | 203 (4.7%)         | 728 (3.4%)             | +26.4%                 |
| DPP-4 inhibitors          | 2 (0.1%)           | 14 (0.2%)             | -40.7%                 | 87 (2.0%)          | 299 (1.4%)             | +29.5%                 |
| GLP-1 agonists            | 11 (0.6%)          | 34 (0.4%)             | +37.9%                 | 54 (1.2%)          | 161 (0.8%)             | +38.8%                 |
| SGLT2 inhibitors          | 6 (0.3%)           | 21 (0.2%)             | +29.7%                 | 41 (0.9%)          | 88 (0.4%)              | +55.9%                 |
| Thiazolidinediones        | 2 (0.1%)           | 9 (0.1%)              | +9.6%                  | 33 (0.8%)          | 86 (0.4%)              | +46.5%                 |
| Other oral antidiabetic   | 14 (0.7%)          | 67 (0.7%)             | +3.8%                  | 205 (4.7%)         | 758 (3.6%)             | +24.1%                 |
| Insulin                   | 26 (1.4%)          | 96 (1.0%)             | +25.8%                 | 312 (7.2%)         | 767 (3.6%)             | +49.5%                 |
| Lipid-lowering drugs      | 171 (8.9%)         | 722 (7.5%)            | +15.2%                 | 1,757 (40.5%)      | 7,111 (33.6%)          | +16.9%                 |
| Antiplatelet drugs        | 72 (3.7%)          | 270 (2.8%)            | +24.7%                 | 1,291 (29.8%)      | 4,598 (21.8%)          | +26.9%                 |
| Oral anticoagulant agents | 30 (1.6%)          | 62 (0.6%)             | +58.5%                 | 613 (14.1%)        | 2,111 (10.0%)          | +29.3%                 |
| Digitalis                 | 1 (0.1%)           | 2 (0.0%)              | +59.8%                 | 65 (1.5%)          | 168 (0.8%)             | +47.0%                 |
| Nitrates                  | 1 (0.1%)           | 18 (0.2%)             | -261.7%                | 200 (4.6%)         | 606 (2.9%)             | +37.8%                 |

|                                                |               |               |        |               |               |        |
|------------------------------------------------|---------------|---------------|--------|---------------|---------------|--------|
| Drugs for respiratory disease as a whole       | 183 (9.5%)    | 649 (6.8%)    | +28.7% | 760 (17.5%)   | 2,521 (11.9%) | +31.9% |
| LABA                                           | 88 (4.6%)     | 266 (2.8%)    | +39.3% | 420 (9.7%)    | 1,261 (6.0%)  | +38.4% |
| SABA                                           | 58 (3.0%)     | 184 (1.9%)    | +36.3% | 210 (4.8%)    | 696 (3.3%)    | +32.0% |
| Inhaled corticosteroids                        | 98 (5.1%)     | 339 (3.5%)    | +30.5% | 401 (9.2%)    | 1,319 (6.2%)  | +32.5% |
| Other drugs for respiratory disease            | 38 (2.0%)     | 68 (0.7%)     | +64.0% | 220 (5.1%)    | 546 (2.6%)    | +49.1% |
| Immunosuppressant agents                       | 187 (9.7%)    | 638 (6.6%)    | +31.5% | 615 (14.2%)   | 2,073 (9.8%)  | +30.8% |
| Non-steroidal anti-inflammatory drugs          | 187 (9.7%)    | 967 (10.1%)   | -3.9%  | 849 (19.6%)   | 3,612 (17.1%) | +12.7% |
| Non-selective COX inhibitors                   | 156 (8.1%)    | 855 (8.9%)    | -10.1% | 708 (16.3%)   | 3,059 (14.5%) | +11.3% |
| Selective COX2 inhibitors                      | 39 (2.0%)     | 180 (1.9%)    | +7.3%  | 213 (4.9%)    | 859 (4.1%)    | +17.2% |
| <b>Comorbidities and associated procedures</b> |               |               |        |               |               |        |
| Cardiovascular disease                         | 165 (8.5%)    | 528 (5.5%)    | +35.7% | 1,726 (39.8%) | 6,151 (29.1%) | +26.9% |
| Coronary artery disease                        | 29 (1.5%)     | 112 (1.2%)    | +22.4% | 444 (10.2%)   | 1,407 (6.7%)  | +35.0% |
| Percutaneous coronary intervention             | 21 (1.1%)     | 86 (0.9%)     | +17.7% | 223 (5.1%)    | 737 (3.5%)    | +32.2% |
| Heart failure                                  | 14 (0.7%)     | 22 (0.2%)     | +68.4% | 309 (7.1%)    | 737 (3.5%)    | +51.0% |
| Respiratory diseases                           | 91 (4.7%)     | 214 (2.2%)    | +52.8% | 560 (12.9%)   | 1,502 (7.1%)  | +45.0% |
| Chronic obstructive pulmonary disease          | 10 (0.5%)     | 11 (0.1%)     | +77.9% | 178 (4.1%)    | 422 (2.0%)    | +51.3% |
| Asthma                                         | 3 (0.2%)      | 3 (0.0%)      | +79.9% | 15 (0.4%)     | 32 (0.2%)     | +56.2% |
| Kidney disease                                 | 17 (0.9%)     | 38 (0.4%)     | +55.1% | 294 (6.8%)    | 780 (3.7%)    | +45.5% |
| Chronic kidney disease                         | 9 (0.5%)      | 15 (0.2%)     | +66.5% | 172 (4.0%)    | 378 (1.8%)    | +54.9% |
| Dialysis                                       | 6 (0.3%)      | 4 (0.0%)      | +86.6% | 43 (1.0%)     | 50 (0.2%)     | +76.1% |
| Cancer                                         | 177 (9.2%)    | 691 (7.2%)    | +21.6% | 914 (21.1%)   | 3,948 (18.7%) | +11.3% |
| <b>Chronic Related Score<sup>‡</sup></b>       |               |               |        |               |               |        |
| 0                                              | 1,268 (65.6%) | 7,151 (74.4%) | -13.3% | 848 (19.5%)   | 5,900 (27.9%) | -42.8% |
| 1                                              | 414 (21.4%)   | 1,689 (17.6%) | +18.0% | 1,036 (23.9%) | 5,936 (28.1%) | -17.6% |
| 2                                              | 175 (9.1%)    | 559 (5.8%)    | +35.8% | 942 (21.7%)   | 4,297 (20.3%) | +6.4%  |
| 3                                              | 43 (2.2%)     | 139 (1.4%)    | +35.1% | 633 (14.6%)   | 2,319 (11.0%) | +24.8% |
| 4                                              | 32 (1.7%)     | 77 (0.8%)     | +51.7% | 881 (20.3%)   | 2,692 (12.7%) | +37.3% |

MV: Matching variables; ACEI: Angiotensin converting enzyme inhibitors; ARB: Angiotensin II receptor blockers; CCB: Calcium channel blocker; MRA: Mineralocorticoid receptor antagonists; DPP-4: Dipeptidyl peptidase 4; GLP-1: Glucagon-like peptide-1; SGLT2: Sodium-glucose co-transporter 2; LABA: Long-acting  $\beta$ -agonists; SABA Short-acting  $\beta$ -agonists

<sup>†</sup> At least one prescription during the year 2019

<sup>‡</sup> Chronic Related Score is a new index of patients' clinical profile derived from inpatient and outpatient services provided by the Regional Health Service and validated for outcome prediction [28]. Five categories of progressively worsening clinical profile are considered

**Table S5.** ARBs, ACEIs, other antihypertensives drugs, drugs for a variety of other diseases, and other features of patients with diagnosis of infection from Covid-19 (cases) and corresponding matched controls according with the severity of clinical manifestations (mild-moderate and critical/fatal)

|                         | Mild-moderate infection |                        |                        | Critical/fatal infection |                       |                        |
|-------------------------|-------------------------|------------------------|------------------------|--------------------------|-----------------------|------------------------|
|                         | Cases<br>(N=5,655)      | Controls<br>(N=27,790) | Relative<br>difference | Cases<br>(N=617)         | Controls<br>(N=2,969) | Relative<br>difference |
| <b>Age, years</b>       |                         |                        |                        |                          |                       |                        |
| Mean (SD)               | 66 (13)                 | 66 (13)                | MV                     | 75 (10)                  | 75 (10)               | MV                     |
| <b>Women</b>            | 2,165 (38%)             | 10,691 (38%)           | MV                     | 138 (22%)                | 666 (22%)             | MV                     |
| <b>Drugs†</b>           |                         |                        |                        |                          |                       |                        |
| Antihypertensive drugs  | 3,185 (56.3%)           | 13,565 (48.8%)         | +13.3%                 | 447 (72.5%)              | 1,754 (59.1%)         | +18.5%                 |
| ACEIs                   | 1,305 (23.1%)           | 5,742 (20.7%)          | +10.5%                 | 197 (31.9%)              | 827 (27.9%)           | +12.8%                 |
| ARBs                    | 1,227 (21.7%)           | 5,257 (18.9%)          | +12.8%                 | 167 (27.1%)              | 653 (22.0%)           | +18.7%                 |
| CCBs                    | 1,230 (21.8%)           | 5,124 (18.4%)          | +15.2%                 | 216 (35.0%)              | 802 (27.0%)           | +22.8%                 |
| Diuretics               | 1,638 (29.0%)           | 6,473 (23.3%)          | +19.6%                 | 264 (42.8%)              | 947 (31.9%)           | +25.5%                 |
| Thiazide/Thiazide-like  | 991 (17.5%)             | 4,464 (16.1%)          | +8.3%                  | 113 (18.3%)              | 610 (20.6%)           | -12.2%                 |
| Loop                    | 706 (12.5%)             | 2,044 (7.4%)           | +41.1%                 | 165 (26.7%)              | 367 (12.4%)           | +53.8%                 |
| MRA                     | 186 (3.3%)              | 625 (2.3%)             | +31.6%                 | 53 (8.6%)                | 113 (3.8%)            | +55.7%                 |
| β-blockers              | 1,556 (27.5%)           | 6,213 (22.4%)          | +18.8%                 | 270 (43.8%)              | 910 (30.7%)           | +30.0%                 |
| Monotherapy             | 977 (17.3%)             | 4,445 (16.0%)          | +7.4%                  | 90 (14.6%)               | 458 (15.4%)           | -5.8%                  |
| Combination therapy     | 2,208 (39.1%)           | 9,120 (32.8%)          | +16.0%                 | 357 (57.9%)              | 1,296 (43.7%)         | +24.6%                 |
| Oral antidiabetic drugs | 723 (12.8%)             | 2,753 (9.9%)           | +22.5%                 | 138 (22.4%)              | 405 (13.6%)           | +39.0%                 |
| Metformin               | 539 (9.5%)              | 2,037 (7.3%)           | +23.1%                 | 89 (14.4%)               | 294 (9.9%)            | +31.4%                 |
| Sulfonylureas           | 171 (3.0%)              | 682 (2.5%)             | +18.8%                 | 43 (7.0%)                | 99 (3.3%)             | +52.2%                 |
| DPP-4 inhibitors        | 65 (1.2%)               | 267 (1.0%)             | +16.4%                 | 24 (3.9%)                | 46 (1.6%)             | +60.2%                 |
| GLP-1 agonists          | 58 (1.0%)               | 174 (0.6%)             | +39.0%                 | 7 (1.1%)                 | 21 (0.7%)             | +37.7%                 |
| SGLT2 inhibitors        | 40 (0.7%)               | 101 (0.4%)             | +48.6%                 | 7 (1.1%)                 | 8 (0.3%)              | +76.3%                 |
| Thiazolidinediones      | 32 (0.6%)               | 84 (0.3%)              | +46.6%                 | 3 (0.5%)                 | 11 (0.4%)             | +23.8%                 |
| Other oral antidiabetic | 184 (3.3%)              | 708 (2.6%)             | +21.7%                 | 35 (5.7%)                | 117 (3.9%)            | +30.5%                 |
| Insulin                 | 277 (4.9%)              | 747 (2.7%)             | +45.1%                 | 61 (9.9%)                | 116 (3.9%)            | +60.5%                 |
| Lipid-lowering drugs    | 1,656 (29.3%)           | 6,861 (24.7%)          | +15.7%                 | 272 (44.1%)              | 972 (32.7%)           | +25.7%                 |
| Antiplatelet drugs      | 1,145 (20.3%)           | 4,208 (15.1%)          | +25.2%                 | 218 (35.3%)              | 660 (22.2%)           | +37.1%                 |

|                                                |               |                |        |             |             |        |
|------------------------------------------------|---------------|----------------|--------|-------------|-------------|--------|
| Oral anticoagulant agents                      | 541 (9.6%)    | 1,860 (6.7%)   | +30.0% | 102 (16.5%) | 313 (10.5%) | +36.2% |
| Digitalis                                      | 55 (1.0%)     | 145 (0.5%)     | +46.4% | 11 (1.8%)   | 25 (0.8%)   | +52.8% |
| Nitrates                                       | 165 (2.9%)    | 530 (1.9%)     | +34.6% | 36 (5.8%)   | 94 (3.2%)   | +45.7% |
| Drugs for respiratory disease as a whole       | 846 (15.0%)   | 2,832 (10.2%)  | +31.9% | 97 (15.7%)  | 338 (11.4%) | +27.6% |
| LABA                                           | 460 (8.1%)    | 1,352 (4.9%)   | +40.2% | 48 (7.8%)   | 175 (5.9%)  | +24.2% |
| SABA                                           | 239 (4.2%)    | 791 (2.9%)     | +32.7% | 29 (4.7%)   | 89 (3.0%)   | +36.2% |
| Inhaled corticosteroids                        | 437 (7.7%)    | 1,487 (5.4%)   | +30.8% | 62 (10.1%)  | 171 (5.8%)  | +42.7% |
| Other drugs for respiratory disease            | 230 (4.1%)    | 527 (1.9%)     | +53.4% | 28 (4.5%)   | 87 (2.9%)   | +35.4% |
| Immunosuppressant agents                       | 727 (12.9%)   | 2,558 (9.2%)   | +28.4% | 75 (12.2%)  | 153 (5.2%)  | +57.6% |
| Non-steroidal anti-inflammatory drugs          | 934 (16.5%)   | 4,105 (14.8%)  | +10.6% | 102 (16.5%) | 474 (16.0%) | +3.4%  |
| Non-selective COX inhibitors                   | 778 (13.8%)   | 3,519 (12.7%)  | +8.0%  | 86 (13.9%)  | 395 (13.3%) | +4.6%  |
| Selective COX2 inhibitors                      | 224 (4.0%)    | 924 (3.3%)     | +16.1% | 28 (4.5%)   | 115 (3.9%)  | +14.7% |
| <b>Comorbidities and associated procedures</b> |               |                |        |             |             |        |
| Cardiovascular disease                         | 1,599 (28.3%) | 5,723 (20.6%)  | +27.2% | 292 (47.3%) | 956 (32.2%) | +32.0% |
| Coronary artery disease                        | 386 (6.8%)    | 1,292 (4.7%)   | +31.9% | 87 (14.1%)  | 227 (7.7%)  | +45.8% |
| Percutaneous coronary intervention             | 202 (3.6%)    | 720 (2.6%)     | +27.5% | 42 (6.8%)   | 103 (3.5%)  | +49.0% |
| Heart failure                                  | 263 (4.7%)    | 634 (2.3%)     | +51.0% | 60 (9.7%)   | 125 (4.2%)  | +56.7% |
| Respiratory diseases                           | 546 (9.7%)    | 1,482 (5.3%)   | +44.8% | 105 (17.0%) | 234 (7.9%)  | +53.7% |
| Chronic obstructive pulmonary disease          | 158 (2.8%)    | 367 (1.3%)     | +52.7% | 30 (4.9%)   | 66 (2.2%)   | +54.3% |
| Asthma                                         | 14 (0.3%)     | 34 (0.1%)      | +50.6% | 4 (0.7%)    | 1 (0.0%)    | +94.8% |
| Kidney disease                                 | 244 (4.3%)    | 690 (2.5%)     | +42.5% | 67 (10.9%)  | 128 (4.3%)  | +60.3% |
| Chronic kidney disease                         | 138 (2.4%)    | 334 (1.2%)     | +50.8% | 43 (7.0%)   | 59 (2.0%)   | +71.5% |
| Dialysis                                       | 43 (0.8%)     | 43 (0.2%)      | +79.7% | 6 (1.0%)    | 11 (0.4%)   | +61.9% |
| Cancer                                         | 949 (16.8%)   | 4,014 (14.4%)  | +13.9% | 142 (23.0%) | 625 (21.1%) | +8.5%  |
| <b>Chronic Related Score‡</b>                  |               |                |        |             |             |        |
| 0                                              | 2,008 (35.5%) | 12,182 (43.8%) | -23.5% | 108 (17.5%) | 869 (29.3%) | -67.2% |
| 1                                              | 1,327 (23.5%) | 6,889 (24.8%)  | -5.6%  | 123 (19.9%) | 736 (24.8%) | -24.4% |
| 2                                              | 989 (17.5%)   | 4,280 (15.4%)  | +11.9% | 128 (20.8%) | 576 (19.4%) | +6.5%  |
| 3                                              | 577 (10.2%)   | 2,121 (7.6%)   | +25.2% | 99 (16.1%)  | 337 (11.4%) | +29.3% |
| 4                                              | 754 (13.3%)   | 2,318 (8.3%)   | +37.4% | 159 (25.8%) | 451 (15.2%) | +41.1% |

MV: Matching variables; SD: Standard deviation; ACEI: Angiotensin converting enzyme inhibitors; ARB: Angiotensin II receptor blockers; CCB: Calcium channel blocker; MRA: Mineralocorticoid receptor antagonists; DPP-4: Dipeptidyl peptidase 4; GLP-1: Glucagon-like peptide-1; SGLT2: Sodium-glucose co-transporter 2; LABA: Long-acting  $\beta$ -agonists; SABA Short-acting  $\beta$ -agonists



† At least one prescription during the year 2019

‡ Chronic Related Score is a new index of patients' clinical profile derived from inpatient and outpatient services provided by the Regional Health Service and validated for outcome prediction [28]. Five categories of progressively worsening clinical profile are considered

**Table S6.** Adjusted odds ratios, and 95% confidence intervals, of infection from Covid-19 associated with use of blockers of the renin-angiotensin system, according with the period on which Covid-19 cases were diagnosed (before and after 26th February, 2020)

|       | Odds ratio (95% confidence interval) <sup>§</sup> |                          |
|-------|---------------------------------------------------|--------------------------|
|       | February 25<br>and before                         | February 26<br>and after |
| ACEIs | 0.92 (0.58 to 1.48)                               | 0.98 (0.88 to 1.08)      |
| ARBs  | 0.80 (0.50 to 1.30)                               | 0.96 (0.86 to 1.06)      |

ACEIs: Angiotensin converting enzyme inhibitors; ARBs: Angiotensin II receptor blockers

<sup>§</sup> Odds ratios of Covid-infection risk associated with drug use. No use was considered as reference. Estimates were obtained by fitting conditional logistic regression. Estimates were unadjusted and full adjusted for drugs and comorbidities listed in the Table 1
