# Supplementary material
Source: PubMed Central journal article supplement (PMC7206933)
Supplement: NEJMoa2006923_data-sharing.pdf [file NEJMoa2006923_data-sharing.pdf]

## Data Sharing Statement

Mancia G, Rea F, Ludergnani M, Apolone G, Corrao G. Renin–Angiotensin–Aldosterone System Blockers and the Risk of Covid-19. N Engl J Med. DOI: 10.1056/NEJMoa2006923.

| Question                                                            | Authors' Response                                                                                                                                                                                                                                                                                                       |
|---------------------------------------------------------------------|-------------------------------------------------------------------------------------------------------------------------------------------------------------------------------------------------------------------------------------------------------------------------------------------------------------------------|
| Will the data collected for your study be made available to others? | No                                                                                                                                                                                                                                                                                                                      |
| Would you like to offer context for your decision?                  | The data that support the findings of this study are available from Lombardy Region, but restrictions apply to the availability of these data, which were used under license for the current study, and so are not publicly available. Data are however available from the the Lombardy Region upon reasonable request. |
| Which data?                                                         | —                                                                                                                                                                                                                                                                                                                       |
| Additional information about data                                   | Details of the databases of health care use in Lombardy have been reported in previous studies.                                                                                                                                                                                                                         |
| How or where can the data be obtained?                              | —                                                                                                                                                                                                                                                                                                                       |
| When will data availability begin?                                  | —                                                                                                                                                                                                                                                                                                                       |
| When will data availability end?                                    | —                                                                                                                                                                                                                                                                                                                       |
| Will any supporting documents be available?                         | —                                                                                                                                                                                                                                                                                                                       |
| Which supporting documents?                                         | —                                                                                                                                                                                                                                                                                                                       |
| Additional information about supporting documents                   | —                                                                                                                                                                                                                                                                                                                       |
| How or where can supporting documents be obtained?                  | —                                                                                                                                                                                                                                                                                                                       |
| When will supporting documents availability begin?                  | —                                                                                                                                                                                                                                                                                                                       |
| When will supporting documents availability end?                    | —                                                                                                                                                                                                                                                                                                                       |
| To whom will data be available?                                     | —                                                                                                                                                                                                                                                                                                                       |
| For what type of analysis or purpose?                               | —                                                                                                                                                                                                                                                                                                                       |
| By what mechanism?                                                  | —                                                                                                                                                                                                                                                                                                                       |
| Any other restrictions?                                             | —                                                                                                                                                                                                                                                                                                                       |
| Additional information                                              | —                                                                                                                                                                                                                                                                                                                       |

This statement was posted on May 1, 2020, at [NEJM.org](https://www.nejm.org).
